# Supplementary material for: Plasma Small Extracellular Vesicle Cardiac miRNA Expression in Patients with Ischemic Heart Failure, Randomized to Percutaneous Intramyocardial Treatment of Adipose Derived Stem Cells or Placebo: Subanalysis of the SCIENCE Study
Source: MDPI journal article supplement (doi:10.3390/ijms241310647), 2023-06-26
Supplement: s1 [file s1]

# Plasma Small Extracellular Vesicle Cardiac miRNA Expression in Patients with Ischemic Heart Failure, Randomized to Percutaneous Intramyocardial Treatment of Adipose Derived Stem Cells or Placebo: Subanalysis of the SCIENCE Study

Supplementary Table S1: List of primary antibodies for western blot analysis

|                    | Dilution | Article number | Company                    |
|--------------------|----------|----------------|----------------------------|
| Primary antibodies |          |                |                            |
| Albumin            | 1:1000   | 4929S          | Cell Signalling Technology |
| CD9                | 1:500    | EXOAB-CD9A-1   | System Biosciences         |
| CD63               | 1:1000   | 40192          | Signalling Antibody        |
| CD81               | 1:1000   | 41779          | Signalling Antibody        |
|                    |          |                |                            |
| Secondary antibody |          |                |                            |
| Goat anti-rabbit   | 1:10 000 | ab6721         | Abcam                      |

Supplementary Table S2: List of miRCURY miRNA Primer Assays

| Name           | Article number | Company |
|----------------|----------------|---------|
| UniSp2         | YP00203950     | Qiagen  |
| UniSp6         | YP00203954     | Qiagen  |
| hsa-miR-1-3p   | YP00204344     | Qiagen  |
| hsa-miR-24-3p  | YP00204260     | Qiagen  |
| hsa-miR-133-3p | YP00204788     | Qiagen  |
| hsa-miR-21-5p  | YP00204230     | Qiagen  |
| hsa-miR499a-5p | YP00205935     | Qiagen  |
| hsa-miR-126-3p | YP00204277     | Qiagen  |

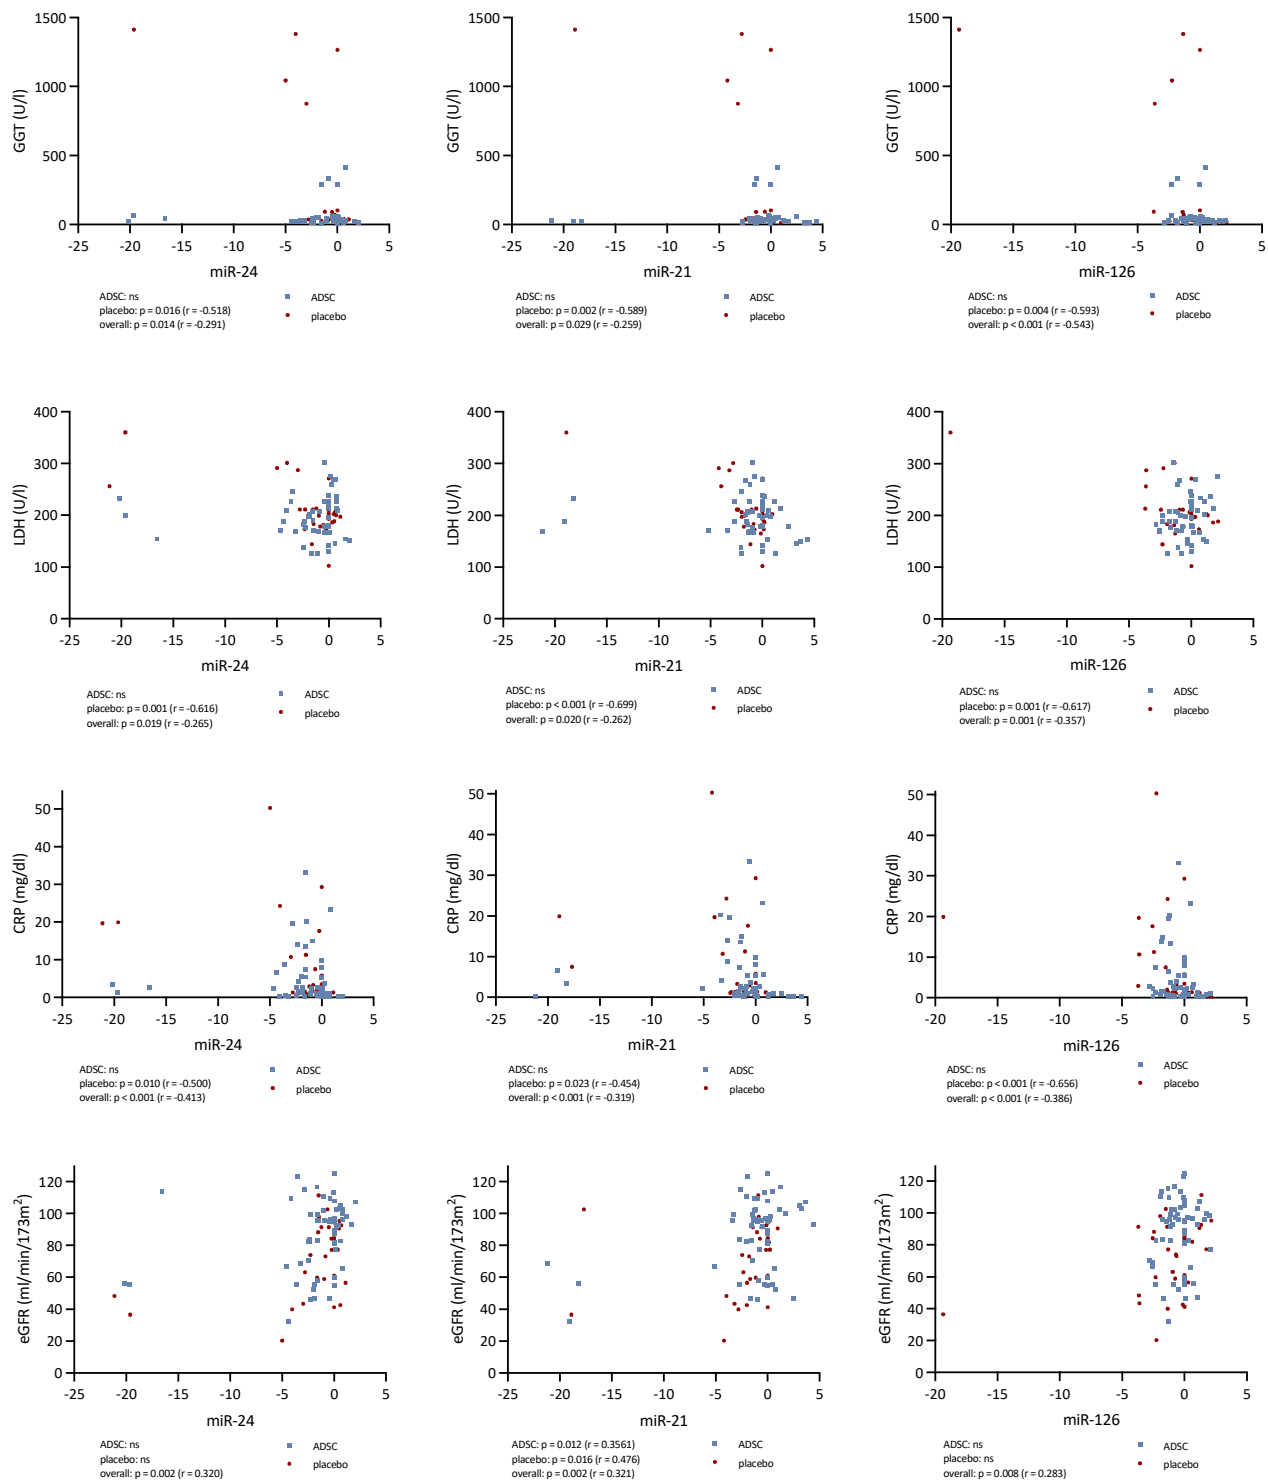

Supplementary Figure S1: Correlation of small EV miRNAs with GGT, LDH, CRP and eGFR

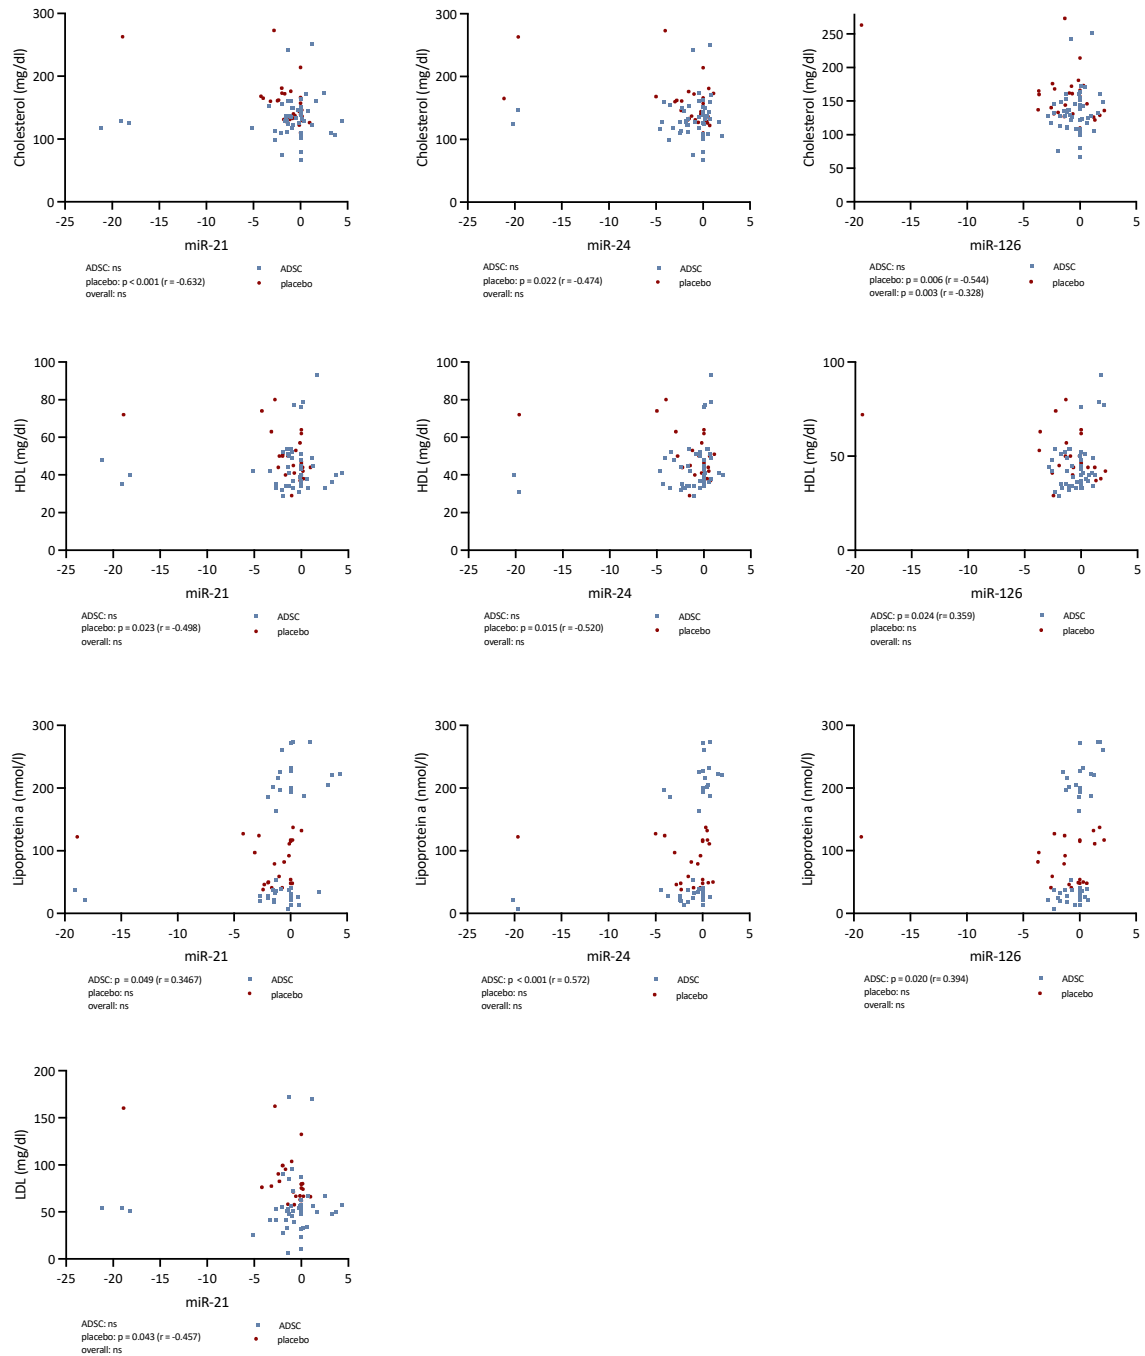

Supplementary Figure S2: Correlation of small EV miRNAs with lipid metabolism parameters
